# Supplementary material for: A new exchange–correlation functional free of delocalization and static correlation errors
Source: Royal Society of Chemistry journal article supplement (doi:10.1039/c4cp01987c), 2014-01-01
Supplement: c4cp01987c1.pdf [file c4cp01987c1.pdf]

## Supporting Information

A new exchange-correlation functional free of delocalization and static correlation errors

Yu Liu and Jianzhong Wu\*

Departments of Chemical and Environmental Engineering and Mathematics,

University of California, Riverside, California 92521, USA

### 1. Solving $\bar{\rho}(\mathbf{r})$ :

We define  $M + 1$  testing density:

$$\rho_i^{(0)} = i\Delta\rho^{(0)} \quad i = 0, 1, \dots, M \quad \backslash * \text{ MERGEFORMAT (S1)}$$

Using classical mapping method, we calculate the corresponding pair correlation function of HEG:

$$h_i^{(0)}(r) = \bar{h}^{\text{CM}}(r, \rho_i^{(0)}) \quad \backslash * \text{ MERGEFORMAT (S2)}$$

Once a density profile  $\rho(\mathbf{r})$  is given, we calculate  $M + 1$  convolutions:

$$I_i(\mathbf{r}) = \int \rho(\mathbf{r}') h_i^{(0)}(|\mathbf{r} - \mathbf{r}'|) d\mathbf{r}' \quad i = 0, 1, \dots, M \quad \backslash * \text{ MERGEFORMAT (S3)}$$

Then, at each  $\mathbf{r}$ , we search an  $I_j(\mathbf{r})$  from  $\{I_0(\mathbf{r}), I_1(\mathbf{r}), \dots, I_M(\mathbf{r})\}$ , by

$$I_j(\mathbf{r}) = -1 \quad \backslash * \text{ MERGEFORMAT (S4)}$$

And  $\bar{\rho}(\mathbf{r})$  can be calculated by:

$$\bar{\rho}(\mathbf{r}) = \rho_j^{(i)} \quad \backslash * \text{MERGEFORMAT (S5)}$$

According to this procedure, it is easy to check  $\bar{\rho}(\mathbf{r})$  satisfy equation (2) in the main text.

Additionally, the exchange correlation potential  $v_{xc}(\mathbf{r})$  and Coulombic potential  $v_{ee}(\mathbf{r})$  can be calculated together:

$$\begin{aligned} v_{xc}(\mathbf{r}) + v_{ee}(\mathbf{r}) &= \int \frac{\rho(\mathbf{r}') \bar{h}(|\mathbf{r} - \mathbf{r}'|)}{|\mathbf{r} - \mathbf{r}'|} d\mathbf{r}' + \int \frac{\rho(\mathbf{r}')}{|\mathbf{r} - \mathbf{r}'|} d\mathbf{r}' \\ &= \int \rho(\mathbf{r}') \frac{1 + \bar{h}(|\mathbf{r} - \mathbf{r}'|)}{|\mathbf{r} - \mathbf{r}'|} d\mathbf{r}' \end{aligned} \quad \backslash * \text{MERGEFORMAT (S6)}$$

We define:

$$\omega_i(r) = \frac{1 + h_i^{(i)}(r)}{r} \quad i = 0, 1, \dots, M \quad \backslash * \text{MERGEFORMAT (S7)}$$

And

$$V_i(\mathbf{r}) = \int \rho(\mathbf{r}') \omega_i(|\mathbf{r} - \mathbf{r}'|) d\mathbf{r}' \quad \backslash * \text{MERGEFORMAT (S8)}$$

Then,  $v_{xc}(\mathbf{r}) + v_{ee}(\mathbf{r})$  can be calculated from:

$$v_{xc}(\mathbf{r}) + v_{ee}(\mathbf{r}) = V_{j(\mathbf{r})}(\mathbf{r}) \quad \backslash * \text{MERGEFORMAT (S9)}$$

In convolution of equation \\* MERGEFORMAT (S3) and \\* MERGEFORMAT (S8), Fast

Fourier Transfer (FFT) is employed:

$$\int A(\mathbf{r}') B(\mathbf{r} - \mathbf{r}') d\mathbf{r}' = \mathbf{F}^{-1} \{ \mathbf{F} [A(\mathbf{r})] \mathbf{F} [B(\mathbf{r})] \} \quad \backslash * \text{MERGEFORMAT (S10)}$$

In this way, direct integration can be avoid and the calculation speed is greatly improved.

## 2. Computational procedure

Self-consistent iteration is used to solve the density profile, the detailed procedure is as following:

- 1) Input necessary parameters, *e.g.*, number of electrons, coordinates of nucleus, pair correlation function calculated from classical mapping method.
- 2) Transform  $h_i^{(0)}(r)$  and  $\omega_i(r)$  into Fourier space,  $h_i^{(0)}(k)$  and  $\omega_i(k)$ . (FFTW3 package)
- 3) Set initial guess of Kohn Sham potential,  $v_{ks}(\mathbf{r}) = v_{ext}(\mathbf{r})$ , set the converge flag as “false”.
- 4) Solve one-body Schrödinger equation with Kohn Sham potential. ( Janecek *et al.*'s package <sup>1</sup>)
- 5) Generate new density profile from the wave function

$$\rho_{new}^{(i)}(\mathbf{r}) = \sum_j \psi_j^*(\mathbf{r})\psi_j(\mathbf{r}) \quad \backslash * \text{MERGEFORMAT (S11)}$$

If it is the first step  $i=1$ , let  $\rho^{(i)}(\mathbf{r}) = \rho_{new}^{(i)}(\mathbf{r})$ ; if  $\rho^{(i)}(\mathbf{r})$  and  $\rho_{new}^{(i)}(\mathbf{r})$  are close enough, set the converge flag as “true”; otherwise, let  $\rho^{(i)}(\mathbf{r}) = (1 - \kappa)\rho_{new}^{(i)}(\mathbf{r}) + \kappa\rho^{(i-1)}(\mathbf{r})$ , where  $\kappa$  is set at 0.75 in this work.

- 6) Transform  $\rho^{(i)}(\mathbf{r})$  into Fourier space and calculate  $I_i(\mathbf{r})$  from equation  $\backslash * \text{MERGEFORMAT (S3)}$  and  $V_i(\mathbf{r})$  from equation  $\backslash * \text{MERGEFORMAT (S8)}$  by FFT.
- 7) Obtain  $j(\mathbf{r})$  from equation  $\backslash * \text{MERGEFORMAT (S5)}$  (discrete form of  $\bar{\rho}(\mathbf{r})$ ).
- 8) Obtain  $v_{xc}(\mathbf{r}) + v_{ec}(\mathbf{r})$  from equation  $\backslash * \text{MERGEFORMAT (S9)}$ .
- 9) Calculate Kohn Sham potential  $v_{ks}(\mathbf{r})$  as well as total energy.

10) If converge flag is “false”, go back to step 4, if “true”, go to the next step.

11) Output and end the calculation.

Reference:

1. S. Janecek and E. Krotscheck, *Computer Physics Communications*, 2008, **178**, 835-842.
